# Supplementary material for: Autonomic, Endocrine, and Inflammation Profiles in Functional Neurological Disorder: A Systematic Review and Meta-Analysis
Source: Atypon-hosted journal article supplement (doi:10.1176/appi.neuropsych.21010025), 2021-10-29
Supplement: appi.neuropsych.21010025.ds001.pdf [file appi.neuropsych.21010025.ds001.pdf]

## Supplementary Table S1. NIH Quality Assessment

| First Author | Year | Study                                                                                                                                                                               | Quality Assessment |                  |                   |                                |                      |                       |                  |                     |                                       |                           |                   |                        |
|--------------|------|-------------------------------------------------------------------------------------------------------------------------------------------------------------------------------------|--------------------|------------------|-------------------|--------------------------------|----------------------|-----------------------|------------------|---------------------|---------------------------------------|---------------------------|-------------------|------------------------|
|              |      |                                                                                                                                                                                     | Case-Controls      |                  |                   |                                |                      |                       |                  |                     | Exposure prior to Outcome Measurement | Valid Exposure Assessment | Assessor Blinding | Analyses for Confounds |
|              |      |                                                                                                                                                                                     | Research Question  | Study Population | Power Calculation | Recruited from Same Population | Inclusion/ Exclusion | Defined Case/ Control | Random Selection | Concurrent Controls |                                       |                           |                   |                        |
| Allendorfer  | 2019 | FMRI response to acute psychological stress differentiates patients with psychogenic non-epileptic seizures from healthy controls – A biochemical and neuroimaging biomarker study. | ✓                  | ✓                | X                 | ✓                              | ✓                    | ✓                     | X                | ✓                   | ✓                                     | ✓                         | NR                | ✓                      |
| Apazoglou    | 2017 | Biological and perceived stress in motor functional neurological disorders.                                                                                                         | ✓                  | X                | X                 | X                              | ✓                    | ✓                     | NA               | NR                  | ✓                                     | ✓                         | NR                | ✓                      |
| Aydin        | 2011 | Time-dependent changes in the serum levels of prolactin, nesfatin-1 and ghrelin as a marker of epileptic attacks young male patients.                                               | ✓                  | X                | X                 | ✓                              | ✓                    | ✓                     | NA               | NR                  | ✓                                     | ✓                         | NR                | NR                     |
| Bakvis       | 2009 | Trauma, stress, and preconscious threat processing in patients with psychogenic nonepileptic seizures.                                                                              | ✓                  | ✓                | X                 | X                              | ✓                    | ✓                     | X                | X                   | ✓                                     | ✓                         | NR                | ✓                      |
| Bakvis       | 2009 | Basal cortisol is positively correlated to threat vigilance in patients with psychogenic nonepileptic seizures.                                                                     | ✓                  | X                | X                 | X                              | ✓                    | ✓                     | NA               | NR                  | ✓                                     | ✓                         | NR                | ✓                      |
| Bakvis       | 2010 | Basal hypercortisolism and trauma in patients with psychogenic nonepileptic seizures.                                                                                               | ✓                  | ✓                | X                 | X                              | ✓                    | ✓                     | NA               | NR                  | ✓                                     | ✓                         | NR                | ✓                      |
| Bakvis       | 2011 | Automatic avoidance tendencies in patients with psychogenic non-epileptic seizures.                                                                                                 | ✓                  | ✓                | X                 | X                              | ✓                    | ✓                     | NA               | NR                  | ✓                                     | ✓                         | NR                | ✓                      |
| Büyükaslan   | 2019 | Evaluation of mean platelet volume, red cell distributed width and neutrophil to lymphocyte ratio in conversion disorder.                                                           | ✓                  | X                | X                 | X                              | ✓                    | ✓                     | NA               | NR                  | ✓                                     | ✓                         | NR                | ✓                      |
| Ceylan       | 2018 | Serum NT-pro CNP levels in epileptic seizure, psychogenic non-epileptic seizure, and healthy subjects.                                                                              | ✓                  | ✓                | X                 | ✓                              | ✓                    | ✓                     | NA               | NR                  | ✓                                     | ✓                         | NR                | NR                     |
| De Oliveira  | 2009 | Movement-induced heart rate changes in epileptic and non-epileptic seizures.                                                                                                        | ✓                  | X                | X                 | ✓                              | X                    | ✓                     | X                | ✓                   | ✓                                     | ✓                         | NR                | NR                     |
| De Oliveira  | 2007 | Heart rate analysis differentiates dialeptic complex partial temporal lobe seizures from auras and non-epileptic seizures.                                                          | ✓                  | X                | X                 | ✓                              | X                    | ✓                     | X                | ✓                   | ✓                                     | ✓                         | NR                | NR                     |
| Demartini    | 2016 | Psychogenic non-epileptic seizures and functional motor symptoms: A common phenomenology?                                                                                           | ✓                  | ✓                | X                 | ✓                              | ✓                    | ✓                     | X                | ✓                   | ✓                                     | ✓                         | NR                | ✓                      |

|             |      |                                                                                                                                                        |   |   |   |    |   |   |    |    |   |    |    |    |
|-------------|------|--------------------------------------------------------------------------------------------------------------------------------------------------------|---|---|---|----|---|---|----|----|---|----|----|----|
| Deveci      | 2007 | Serum brain-derived neurotrophic factor levels in conversion disorder: Comparative study with depression.                                              | ✓ | X | X | ✓  | ✓ | ✓ | NA | NR | ✓ | ✓  | NR | NR |
| Dreissen    | 2017 | Startle responses in functional jerky movement disorders are increased but have a normal pattern.                                                      | ✓ | X | X | ✓  | ✓ | ✓ | X  | ✓  | ✓ | ✓  | NR | ✓  |
| Gallagher   | 1987 | Endocrine abnormalities in human temporal lobe epilepsy.                                                                                               | ✓ | X | X | ✓  | X | ✓ | NA | NR | ✓ | NR | NR | NR |
| Gallagher   | 1984 | Pituitary and adrenal function in epileptic patients.                                                                                                  | ✓ | X | X | X  | ✓ | ✓ | NA | NR | ✓ | ✓  | NR | NR |
| Herrero     | 2020 | Skin conductance response and emotional response in women with psychogenic non-epileptic seizures.                                                     | ✓ | ✓ | X | ✓  | ✓ | ✓ | NA | ✓  | ✓ | ✓  | NR | ✓  |
| Heyer       | 2018 | Signs of autonomic arousal precede tilt-induced psychogenic nonsyncopal collapse among youth.                                                          | ✓ | ✓ | X | ✓  | ✓ | ✓ | X  | ✓  | ✓ | ✓  | NR | NR |
| Higgitt     | 1990 | The prolonged benzodiazepine withdrawal syndrome: Anxiety or hysteria?                                                                                 | ✓ | X | X | X  | X | ✓ | NA | NR | ✓ | NR | NR | ✓  |
| Holtkamp    | 2006 | Diagnosis of psychogenic nonepileptic status epilepticus in the emergency settings.                                                                    | ✓ | ✓ | X | ✓  | ✓ | ✓ | X  | ✓  | ✓ | X  | NR | ✓  |
| Jeppesen    | 2016 | Comparing maximum autonomic activity of psychogenic non-epileptic seizures and epileptic seizures using heart rate variability.                        | ✓ | ✓ | X | ✓  | X | ✓ | X  | ✓  | ✓ | ✓  | NR | NR |
| Khanam      | 2008 | Serum immunoglobulin profiles of conversion disorder patients.                                                                                         | ✓ | X | X | NR | ✓ | ✓ | X  | NR | ✓ | ✓  | NR | ✓  |
| Kotwas      | 2019 | Subjective and physiological response to emotions in temporal lobe epilepsy and psychogenic non-epileptic seizures.                                    | ✓ | X | X | ✓  | ✓ | ✓ | X  | ✓  | ✓ | ✓  | NR | NR |
| Kozłowska   | 2015 | Reduction of autonomic regulation in children and adolescents with conversion disorders.                                                               | ✓ | ✓ | X | ✓  | ✓ | ✓ | X  | ✓  | ✓ | ✓  | NR | ✓  |
| Kozłowska   | 2017 | The Respiratory Control of Carbon Dioxide in Children and Adolescents Referred for Treatment of Psychogenic Non-Epileptic Seizures.                    | ✓ | ✓ | X | ✓  | ✓ | ✓ | X  | ✓  | ✓ | ✓  | NR | NR |
| Kozłowska   | 2018 | "Motoring in idle": The default mode and somatomotor networks are overactive in children and adolescents with functional neurological symptoms.        | ✓ | ✓ | X | ✓  | ✓ | ✓ | X  | ✓  | ✓ | ✓  | NR | ✓  |
| Kugu        | 2004 | Muscle enzymes, blood gases and quantitative EEG in differential diagnosis of generalized tonic-clonic seizures and conversive non-epileptic seizures. | ✓ | X | X | NR | ✓ | ✓ | NA | NR | ✓ | ✓  | NR | NR |
| Lader       | 1968 | Anxiety in patients with hysterical conversion symptoms.                                                                                               | ✓ | X | X | X  | ✓ | ✓ | NA | NR | ✓ | ✓  | NR | NR |
| Lafrance Jr | 2010 | Decreased serum BDNF levels in patients with epileptic and psychogenic nonepileptic seizures.                                                          | ✓ | ✓ | X | ✓  | ✓ | ✓ | X  | ✓  | ✓ | ✓  | NR | ✓  |
| Matz        | 2016 | Lactate as a diagnostic marker in transient loss of consciousness.                                                                                     | ✓ | ✓ | X | ✓  | ✓ | ✓ | NA | ✓  | ✓ | ✓  | NR | NR |

|             |      |                                                                                                                                                         |   |   |   |    |   |   |    |    |   |    |    |    |
|-------------|------|---------------------------------------------------------------------------------------------------------------------------------------------------------|---|---|---|----|---|---|----|----|---|----|----|----|
| Maurer      | 2016 | Impaired resting vagal tone in patients with functional movement disorders.                                                                             | ✓ | ✓ | X | X  | ✓ | ✓ | X  | X  | ✓ | X  | NR | ✓  |
| Maurer      | 2015 | Biological measure of stress levels in patients with functional movement disorders.                                                                     | ✓ | ✓ | X | X  | ✓ | ✓ | NA | ✓  | ✓ | ✓  | NR | ✓  |
| Mehta       | 1994 | Prolactin and cortisol levels in seizure disorders.                                                                                                     | ✓ | X | X | X  | X | ✓ | NA | NR | ✓ | ✓  | NR | NR |
| Miani       | 2019 | Predicting psychogenic non-epileptic seizures from serum levels of neuropeptide Y and adrenocorticotrophic hormone.                                     | ✓ | X | X | X  | ✓ | ✓ | NA | NR | ✓ | ✓  | NR | ✓  |
| Mungen      | 2010 | Autonomic nervous system functions in interictal and postictal periods of nonepileptic psychogenic seizures and its comparison with epileptic seizures. | ✓ | ✓ | X | ✓  | ✓ | ✓ | ✓  | ✓  | ✓ | ✓  | NR | ✓  |
| Novakova    | 2017 | Diurnal patterns and relationships between physiological and self-reported stress in patients with epilepsy and psychogenic non-epileptic seizures.     | ✓ | X | X | ✓  | ✓ | ✓ | X  | ✓  | ✓ | ✓  | NR | ✓  |
| Olaciregui  | 2018 | The discriminative value of blood gas analysis parameters in the differential diagnosis of transient disorders of consciousness.                        | ✓ | ✓ | X | ✓  | ✓ | ✓ | ✓  | ✓  | ✓ | ✓  | NR | NR |
| Opherk      | 2002 | Ictal heart rate differentiates epileptic from non-epileptic seizures.                                                                                  | ✓ | ✓ | X | ✓  | ✓ | ✓ | X  | ✓  | ✓ | ✓  | NR | NR |
| Pankova     | 1983 | Autonomic-humoral regulation in neuroses and neurotic development of the personality.                                                                   | ✓ | X | X | X  | X | X | NA | NR | ✓ | ✓  | NR | NR |
| Pick        | 2020 | Dissociation and interoception in functional neurological disorder.                                                                                     | ✓ | X | X | ✓  | ✓ | ✓ | NA | ✓  | ✓ | ✓  | NR | ✓  |
| Pick        | 2018 | Autonomic and subjective responsivity to emotional images in people with dissociative seizures.                                                         | ✓ | X | X | ✓  | X | ✓ | X  | ✓  | ✓ | ✓  | NR | ✓  |
| Pick        | 2016 | Explicit Facial Emotion Processing in Patients With Dissociative Seizures.                                                                              | ✓ | ✓ | X | ✓  | ✓ | ✓ | ✓  | ✓  | ✓ | ✓  | NR | ✓  |
| Ponnusamy   | 2012 | Comparison of heart rate variability parameters during complex partial seizures and psychogenic nonepileptic seizures.                                  | ✓ | ✓ | X | ✓  | ✓ | ✓ | X  | ✓  | ✓ | ✓  | NR | ✓  |
| Ponnusamy   | 2011 | Heart rate variability measures as biomarkers in patients with psychogenic nonepileptic seizures: Potential and limitations.                            | ✓ | ✓ | X | X  | ✓ | ✓ | X  | X  | ✓ | ✓  | NR | ✓  |
| Radmanesh   | 2020 | Activation of Functional Brain Networks in Children With Psychogenic Non-epileptic Seizures.                                                            | ✓ | ✓ | X | ✓  | ✓ | ✓ | NA | ✓  | ✓ | ✓  | NR | ✓  |
| Redlich     | 1945 | Organic and hysterical anesthesia; a method of differential diagnosis with the aid of the galvanic skin response.                                       | ✓ | X | X | NR | X | X | NA | ✓  | ✓ | NR | NR | NR |
| Reinsberger | 2012 | Pre- and postictal, not ictal, heart rate distinguishes complex partial and psychogenic nonepileptic seizures.                                          | ✓ | ✓ | X | ✓  | X | X | X  | ✓  | ✓ | ✓  | ✓  | NR |

|             |      |                                                                                                                                                |   |   |   |    |    |    |    |    |   |    |    |    |
|-------------|------|------------------------------------------------------------------------------------------------------------------------------------------------|---|---|---|----|----|----|----|----|---|----|----|----|
| Reinsberger | 2015 | Autonomic changes in psychogenic nonepileptic seizures: toward a potential diagnostic biomarker?                                               | ✓ | X | X | ✓  | NR | ✓  | X  | ✓  | ✓ | ✓  | NR | NR |
| Rice        | 1969 | Psychophysiological correlates of la belle indifference.                                                                                       | ✓ | X | X | ✓  | ✓  | X  | NA | ✓  | ✓ | NR | NR | NR |
| Roberts     | 2012 | Emotion in psychogenic nonepileptic seizures: Responses to affective pictures.                                                                 | ✓ | X | X | X  | ✓  | ✓  | NA | ✓  | ✓ | ✓  | NR | ✓  |
| Roberts     | 2019 | Emotional Reactivity as a Vulnerability for Psychogenic Nonepileptic Seizures? Responses While Reliving Specific Emotions.                     | ✓ | ✓ | X | ✓  | NR | ✓  | X  | ✓  | ✓ | ✓  | NR | ✓  |
| Romigi      | 2020 | Heart Rate Variability Parameters During Psychogenic Non-epileptic Seizures: Comparison Between Patients With Pure PNES and Comorbid Epilepsy. | ✓ | ✓ | X | ✓  | ✓  | ✓  | X  | ✓  | ✓ | NR | NR | ✓  |
| Sanyal      | 1998 | Electro-dermal arousal and self-appraisal in patients with somatization disorder.                                                              | ✓ | X | X | NR | NR | ✓  | NR | ✓  | ✓ | ✓  | NR | NR |
| Seignourel  | 2007 | Abnormal affective startle modulation in individuals with psychogenic [corrected] movement disorder.                                           | ✓ | X | X | X  | ✓  | ✓  | X  | NR | ✓ | ✓  | NR | NR |
| Shah        | 2001 | Peripheral WBC Count and Serum Prolactin Level in Various Seizure Types and Nonepileptic Events.                                               | ✓ | X | X | NR | ✓  | NA | NA | NR | ✓ | ✓  | NR | ✓  |
| Tiyekli     | 2013 | Proinflammatory cytokine levels in patients with conversion disorder.                                                                          | ✓ | ✓ | X | NR | ✓  | ✓  | X  | ✓  | ✓ | ✓  | NR | ✓  |
| Tunca       | 1996 | Is conversion disorder biologically related with depression?: A DST study.                                                                     | ✓ | X | X | ✓  | ✓  | ✓  | NA | NR | ✓ | NR | NR | ✓  |
| Wyllie      | 1985 | Postictal Serum Creatine Kinase in the Diagnosis of Seizure Disorders.                                                                         | ✓ | X | X | X  | X  | X  | NA | ✓  | ✓ | NR | NR | NR |
| Zhang       | 2008 | Changes of serum adrenocorticotrophic hormone and cortisol levels during sleep seizures.                                                       | ✓ | X | X | X  | X  | ✓  | NA | NR | ✓ | ✓  | NR | NR |
| Zito        | 2019 | Abnormal postural behavior in patients with functional movement disorders during exposure to stress.                                           | ✓ | X | X | X  | ✓  | ✓  | NA | NR | ✓ | ✓  | NR | ✓  |
| Winterdahl  | 2017 | Vulnerability to psychogenic non-epileptic seizures is linked to low neuropeptide Y levels.                                                    | ✓ | X | X | X  | ✓  | ✓  | NA | NR | ✓ | ✓  | NR | ✓  |

|                |      |                                                                                                                            | Cohort Studies    |                  |                                 |                                                              |                           |                                                |                                        |                                                                  |                                   |                                  |                        |                         |                                       |                                              |
|----------------|------|----------------------------------------------------------------------------------------------------------------------------|-------------------|------------------|---------------------------------|--------------------------------------------------------------|---------------------------|------------------------------------------------|----------------------------------------|------------------------------------------------------------------|-----------------------------------|----------------------------------|------------------------|-------------------------|---------------------------------------|----------------------------------------------|
|                |      |                                                                                                                            | Research question | Study population | Participation rate at least 50% | Groups recruited from the same population? Uniform criteria? | Sample size justification | Exposure of interest measured prior to outcome | Timeframe sufficient to expect outcome | For exposures that vary in amount - was the exposure stratified? | Exposure measures clearly defined | Exposure assessed more than once | Valid outcome measures | Outcome assessors blind | Follow-up after baseline 20% or less? | Confounding variables measured and adjusted? |
| Claffey        | 2020 | Near-infrared spectroscopy in evaluating psychogenic pseudosyncope - A novel diagnostic approach.                          | ✓                 | X                | NA                              | NA                                                           | X                         | ✓                                              | NA                                     | NA                                                               | ✓                                 | X                                | ✓                      | NR                      | NA                                    | X                                            |
| Kozłowska      | 2019 | Blood CRP levels are elevated in children and adolescents with functional neurological symptom disorder.                   | ✓                 | ✓                | ✓                               | NA                                                           | X                         | ✓                                              | NA                                     | NA                                                               | ✓                                 | NR                               | ✓                      | NR                      | X                                     | ✓                                            |
| Rabavilas      | 1989 | Clinical significance of the electrodermal habituation rate in anxiety disorders.                                          | ✓                 | X                | NA                              | NA                                                           | X                         | ✓                                              | NA                                     | NA                                                               | ✓                                 | X                                | ✓                      | NR                      | NA                                    | X                                            |
| Sawchuk        | 2020 | Psychogenic non-epileptic seizures in children - psychophysiology & dissociative characteristics.                          | ✓                 | ✓                | ✓                               | NA                                                           | X                         | ✓                                              | NA                                     | NA                                                               | ✓                                 | X                                | ✓                      | NR                      | ✓                                     | ✓                                            |
| van der Kruijs | 2016 | Autonomic nervous system functioning associated with psychogenic nonepileptic seizures: Analysis of heart rate variability | ✓                 | ✓                | NA                              | NA                                                           | X                         | ✓                                              | NA                                     | NA                                                               | ✓                                 | ✓                                | ✓                      | NR                      | NA                                    | X                                            |

**Abbreviations:** NR: Not reported; NA: Not applicable.

## Supplementary Figure 1

### Funnel Plot and Sensitivity Analysis of Baseline Heart Rate between Functional Neurological Disorder Patients vs. Healthy Controls

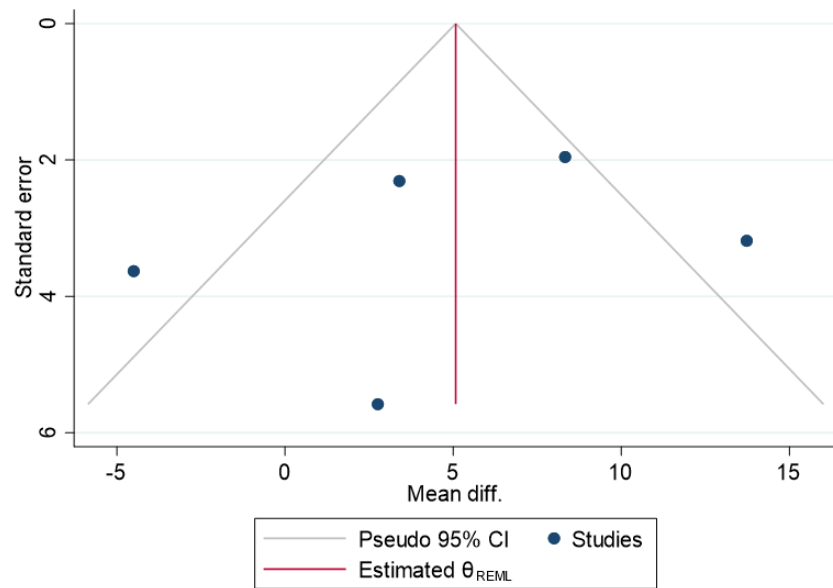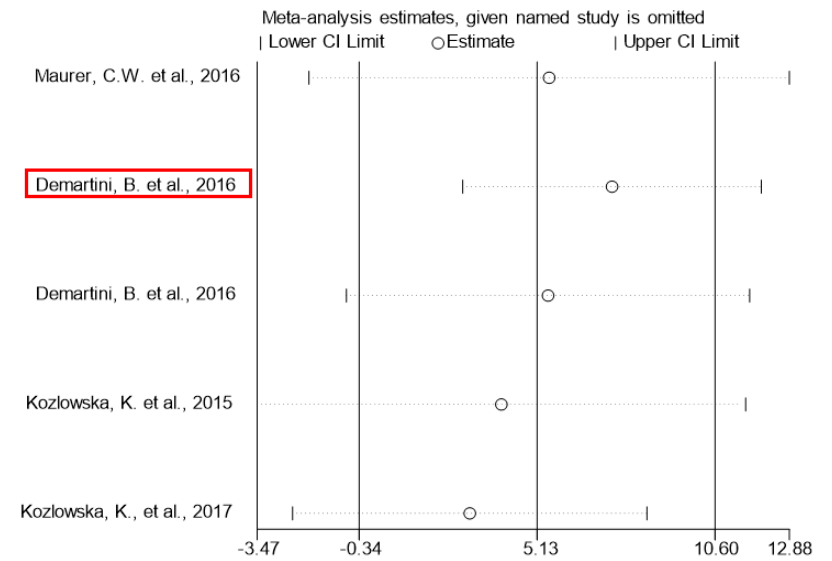

## Supplementary Figure 2

### Funnel Plot and Sensitivity Analysis of Peri-Ictal Heart Rate between Functional Neurological Disorder vs. Epilepsy Patients

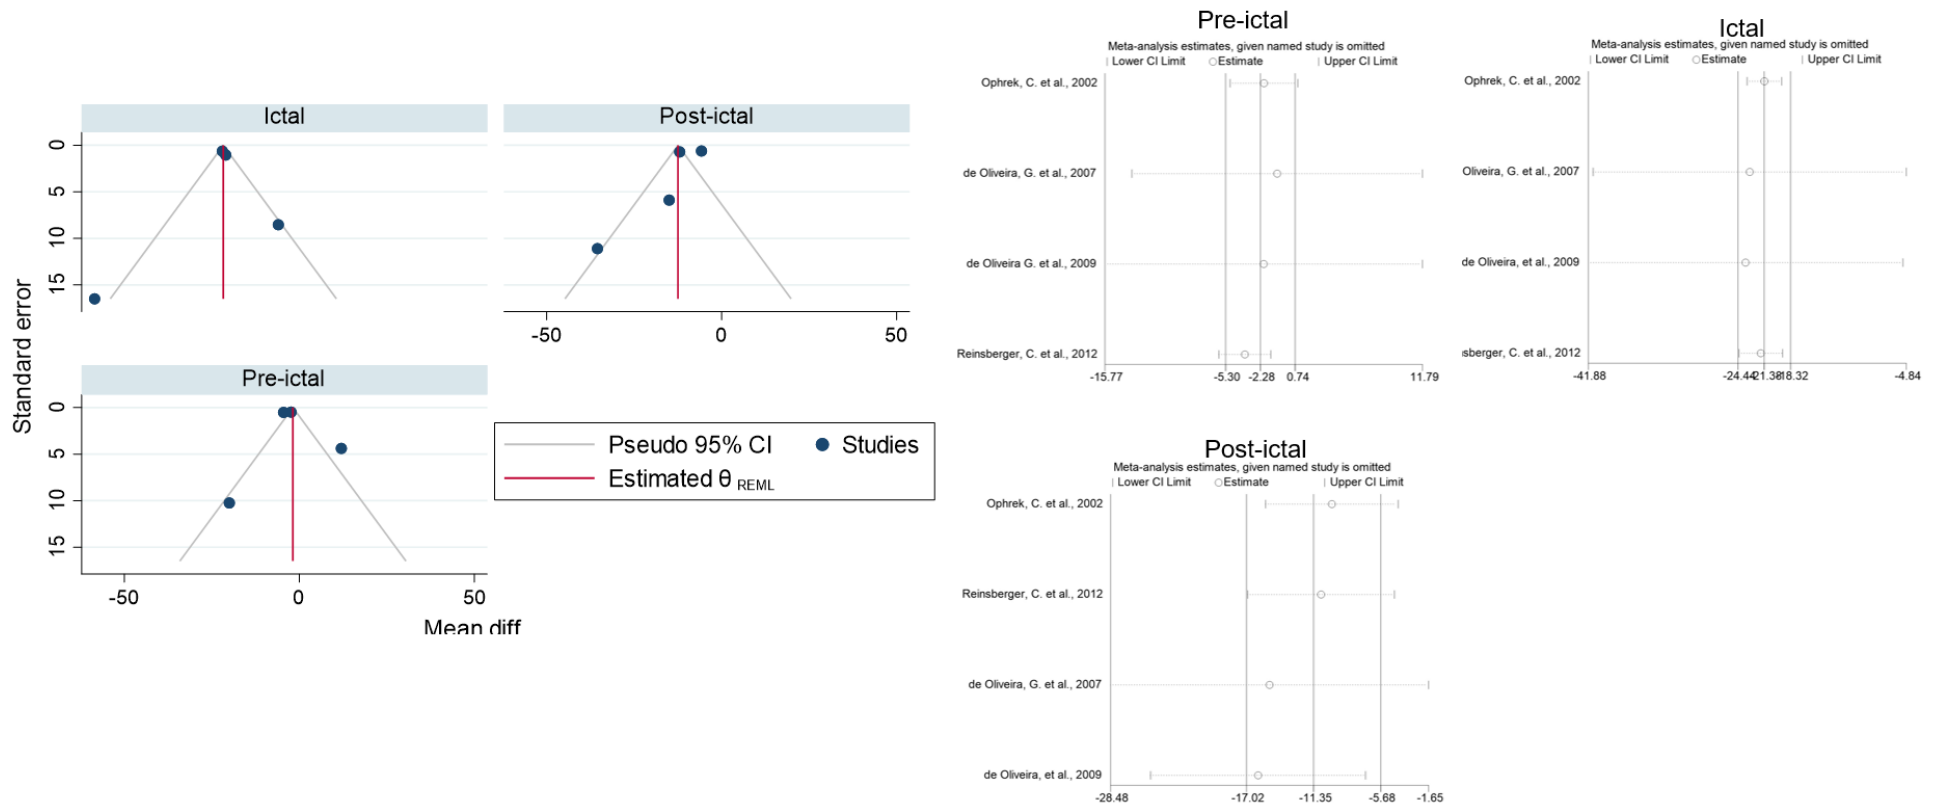

## Supplementary Figure 3

### Funnel Plot and Sensitivity Analysis of Baseline Heart Rate Variability between Functional Neurological Disorder Patients vs. Healthy Controls

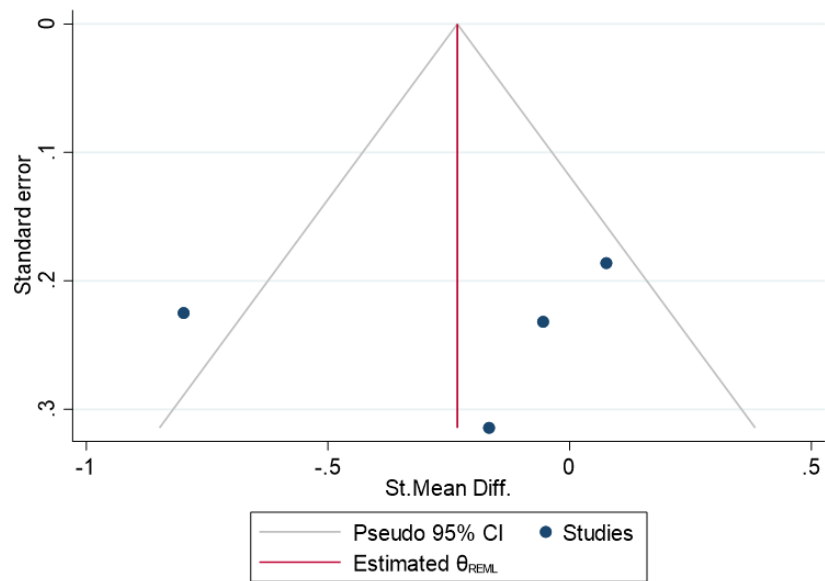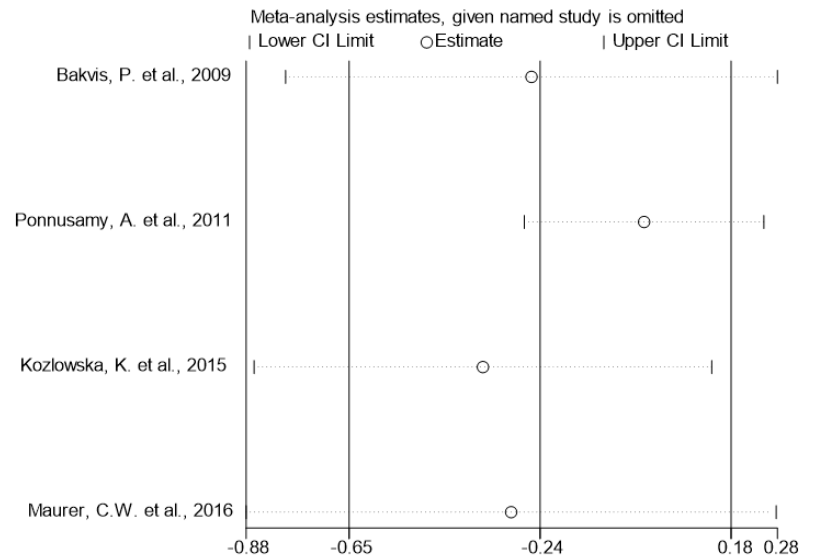



## Supplementary Figure 4

### Funnel Plot and Sensitivity Analysis of Baseline Cortisol between Functional Neurological Disorder Patients vs. Healthy Controls

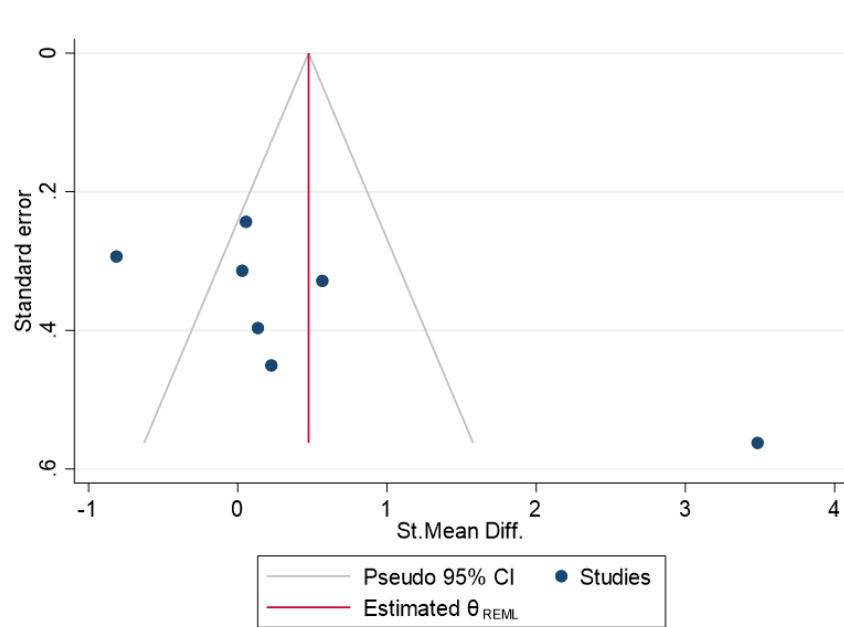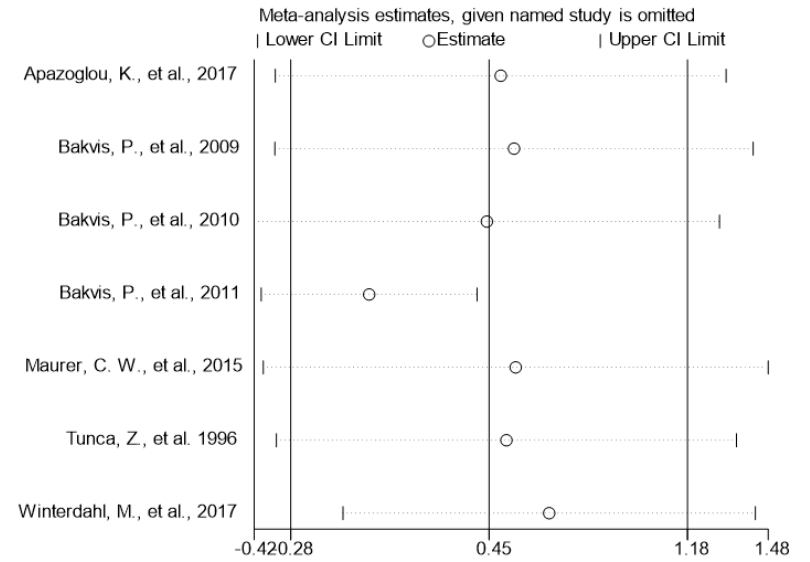

## Supplementary Figure 5

### Funnel Plot and Sensitivity Analysis of Baseline Cortisol between Functional Neurological Disorder vs. Epilepsy Patients

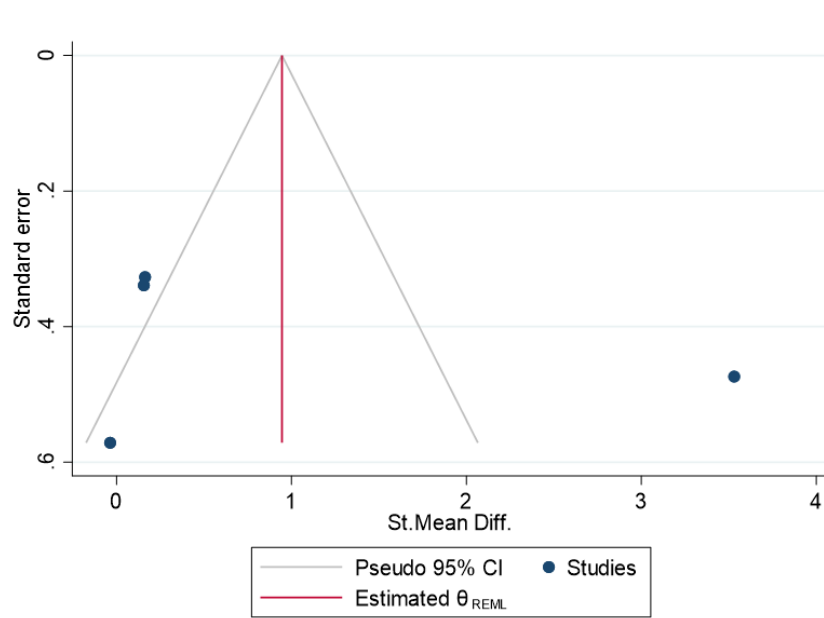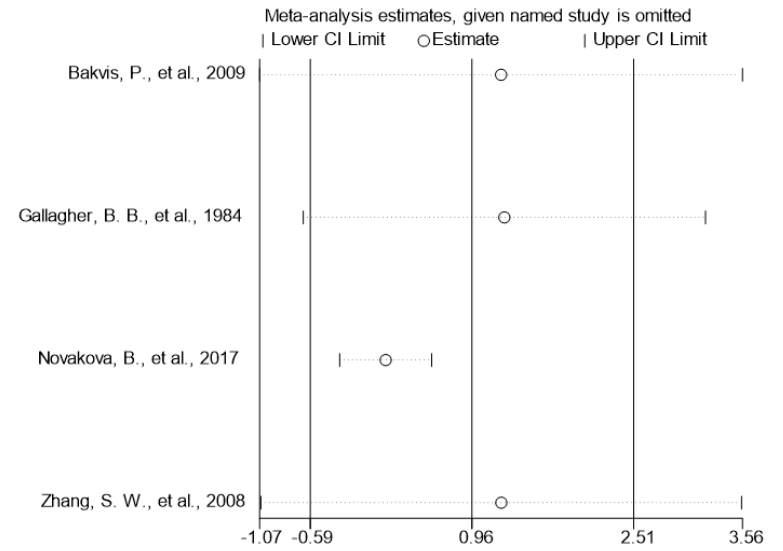

## Supplementary Figure 6

### Funnel Plot and Sensitivity Analysis of Within-Group Comparison of Functional Neurological Disorder Peri-Ictal Heart Rate

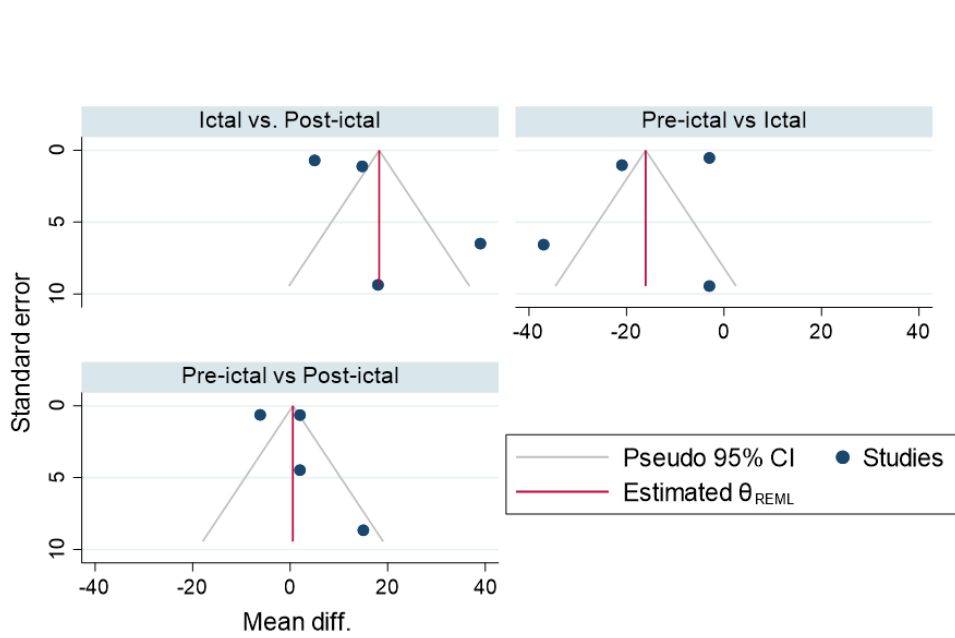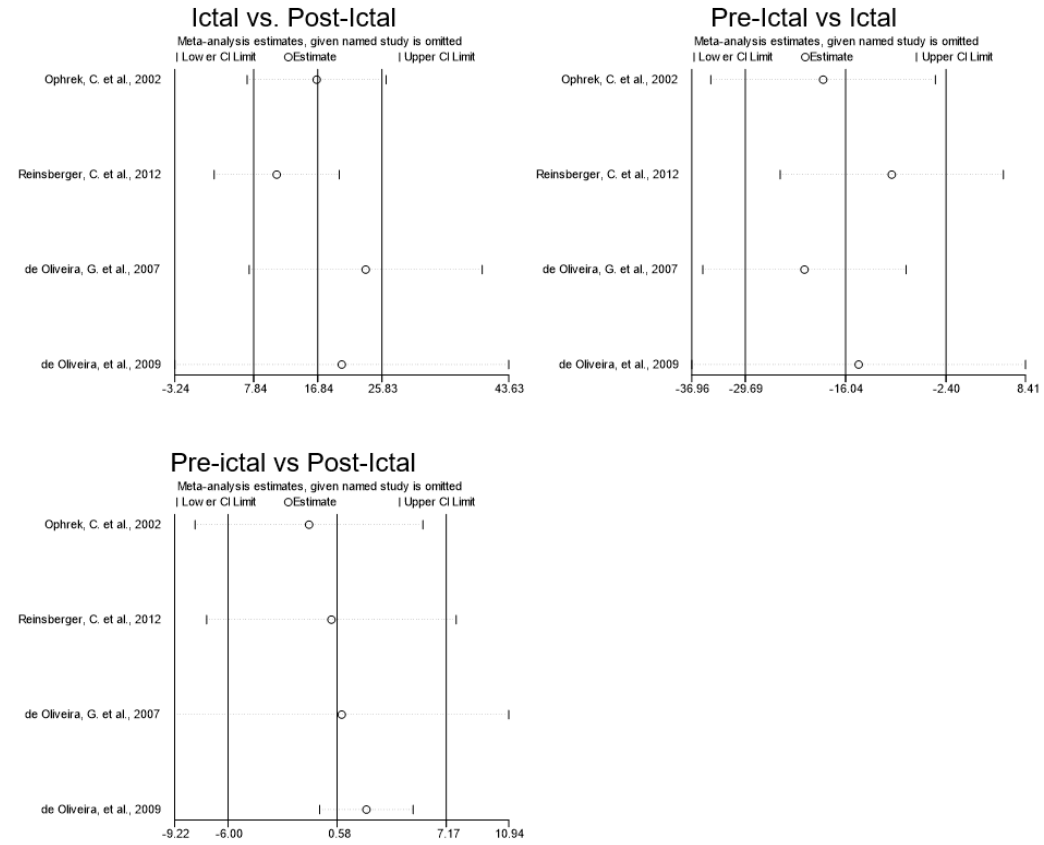

## Supplementary Figure 7

### Funnel Plot and Sensitivity Analysis Task Skin Conductance Levels in Functional Neurological Disorder vs. Healthy Controls

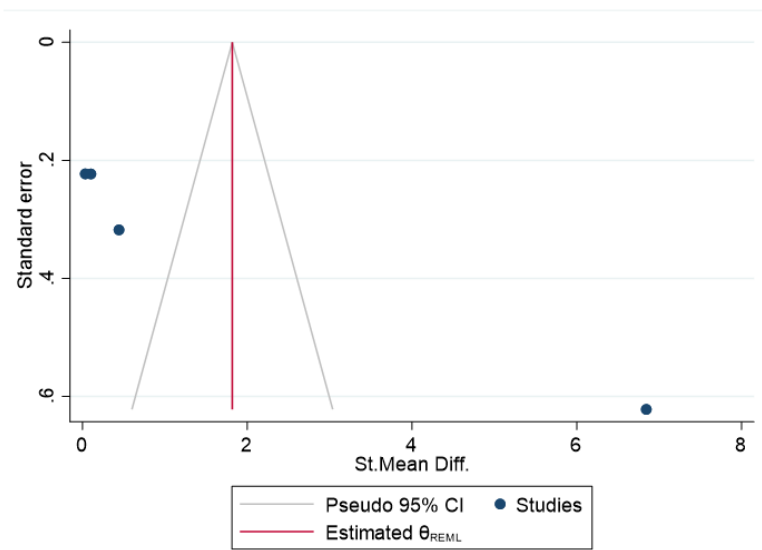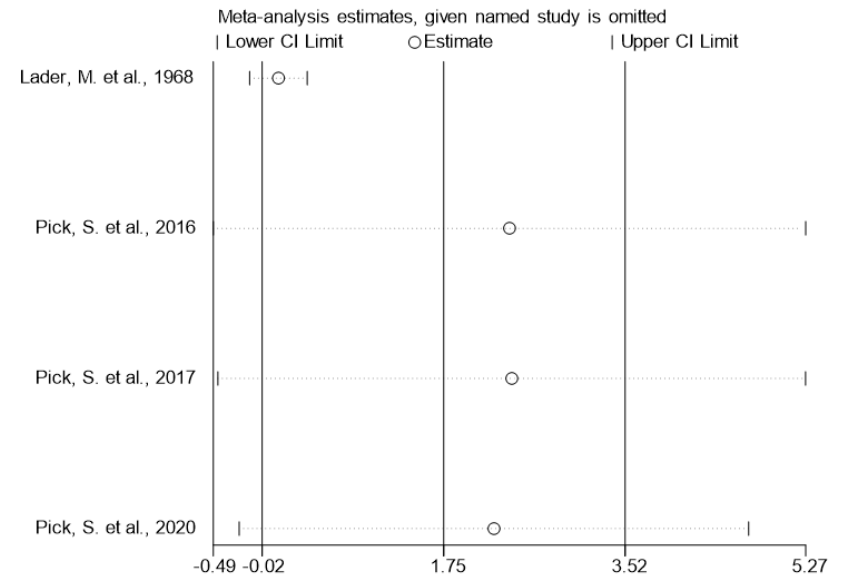

## Supplementary Figure 8

### Within-Group Comparison of Peri-ictal Heart Rate in Functional Neurological Disorder

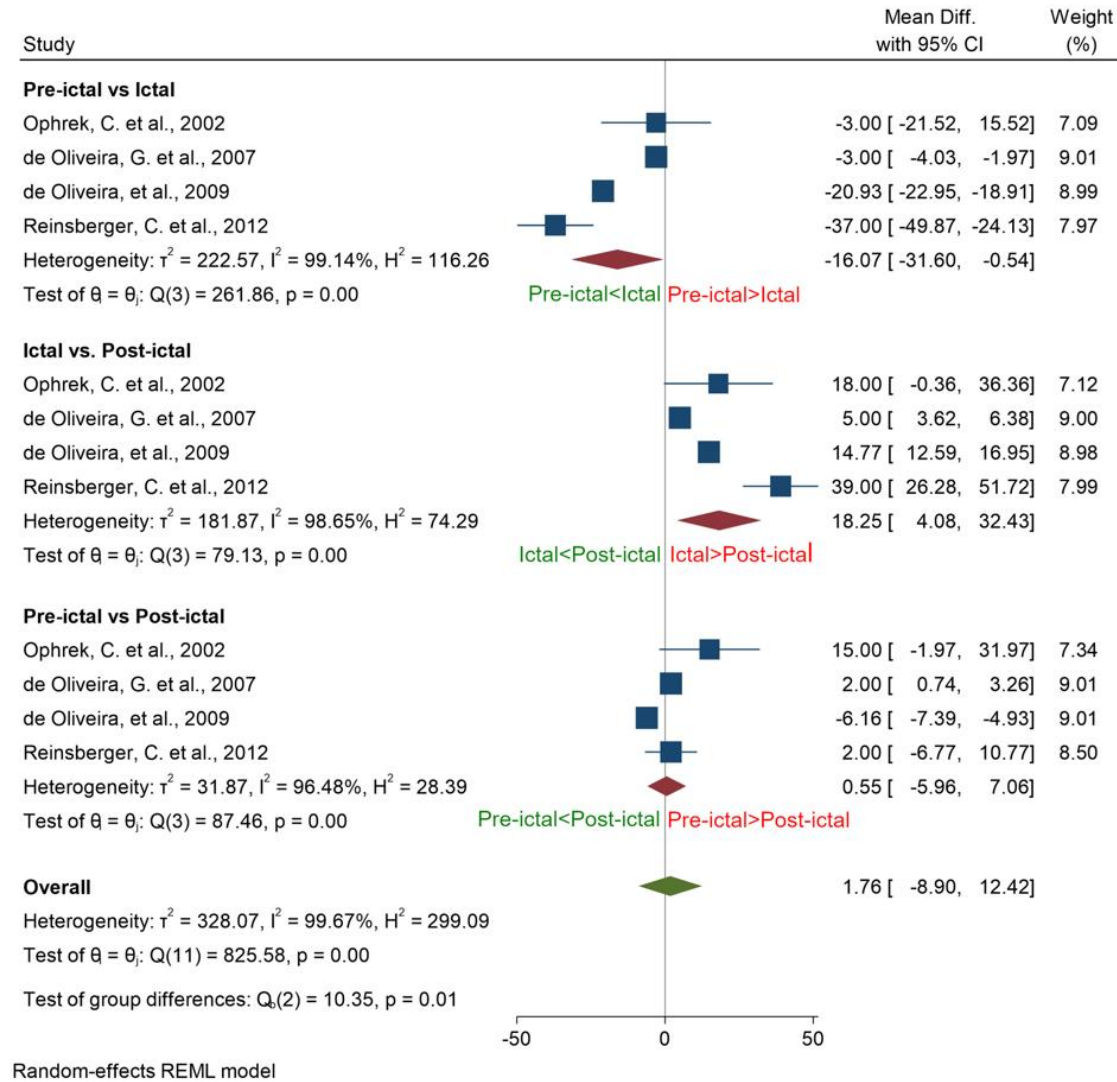

## Supplementary Figure 9

### Task Skin Conductance Levels in Functional Neurological Disorder vs Healthy Controls

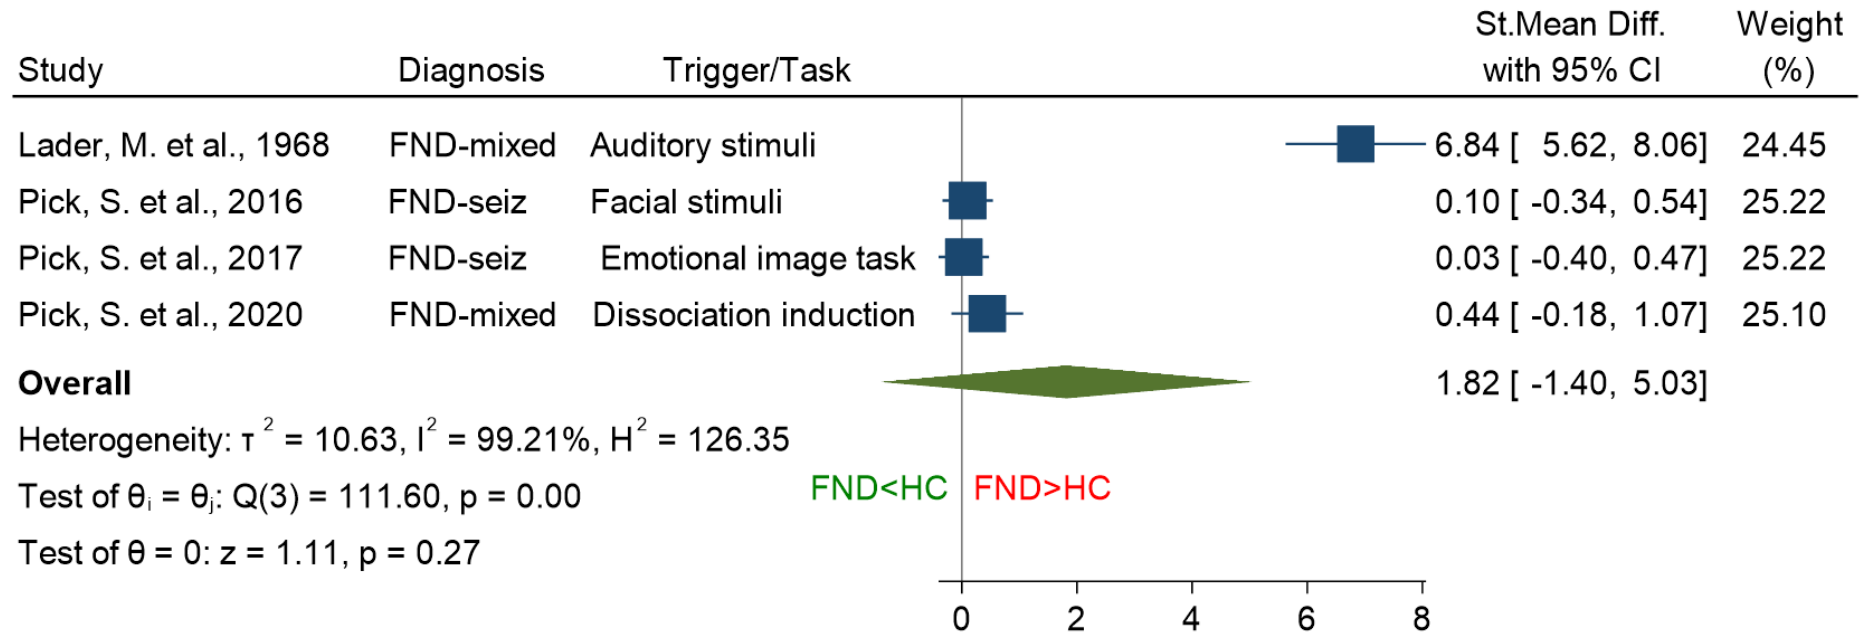

Random-effects REML model
